# Supplementary material for: Predicting Early Disease Recurrence of Pancreatic Cancer following Surgery: Determining the Role of NUDT15 as a Prognostic Biomarker
Source: MDPI journal article supplement (doi:10.3390/curroncol29040206), 2022-04-06
Supplement: s1 [file s1]

## Supplementary material

Table S1 - Table of the top 21 differentially expressed genes between patients with and without **an** early recurrence following resection for PDAC. Genes are ordered as per a decreasing FDR rate. (logFC = log fold change; logCPM = log counts per million; FDR = False Discovery rate) .

| Genes    | logFC       | logCPM       | LR          | P Value  | FDR        |
|----------|-------------|--------------|-------------|----------|------------|
| PGAP3    | 2.234863421 | 6.692849271  | 85.43104973 | 2.40E-20 | 3.12E-16   |
| ERBB2    | 2.048574468 | 8.702957168  | 66.3790854  | 3.72E-16 | 2.42E-12   |
| C20orf56 | 3.472741222 | 5.999955935  | 64.42943056 | 1.00E-15 | 4.34E-12   |
| GRIP2    | 2.800221839 | 0.34221273   | 58.88971646 | 1.67E-14 | 5.43E-11   |
| HEPACAM2 | 3.52979217  | 4.680186101  | 52.9183579  | 3.48E-13 | 9.04E-10   |
| REP15    | 2.833085067 | 2.439755412  | 52.56329868 | 4.17E-13 | 9.04E-10   |
| BPI      | 2.897046925 | 0.212890127  | 45.59065609 | 1.46E-11 | 2.71E-08   |
| CD177    | 3.085022682 | 3.372787741  | 44.8040761  | 2.18E-11 | 3.54E-08   |
| MUC2     | 5.677339448 | 8.25616174   | 44.43688388 | 2.63E-11 | 3.80E-08   |
| C17orf37 | 1.44088583  | 5.997701124  | 43.96865629 | 3.34E-11 | 4.34E-08   |
| HES6     | 2.070971354 | 3.999807969  | 42.41237216 | 7.39E-11 | 8.75E-08   |
| KLHL32   | 2.268442251 | 0.512018374  | 37.16812282 | 1.08E-09 | 1.18E-06   |
| PKD1L2   | 2.484755825 | 0.781779596  | 35.88371452 | 2.09E-09 | 2.10E-06   |
| CDX1     | 2.951638627 | 2.825814057  | 35.40002688 | 2.68E-09 | 2.50E-06   |
| CCL24    | 2.716997309 | 1.53944708   | 31.92261059 | 1.60E-08 | 1.37E-05   |
| MYADML2  | 2.953404861 | -0.592385685 | 31.82951301 | 1.68E-08 | 1.37E-05   |
| KLK12    | 4.246698942 | 0.35431791   | 29.66490429 | 5.14E-08 | 3.83E-05   |
| APCDD1L  | 1.999333334 | 2.693405844  | 29.60405642 | 5.30E-08 | 3.83E-05   |
| GRB7     | 1.510253759 | 6.005227248  | 28.60095229 | 8.89E-08 | 6.09E-05   |
| MCM7     | 0.804754718 | 6.798879106  | 27.66823142 | 1.44E-07 | 9.37E-05   |
| HSD11B2  | 1.743807374 | 5.683524172  | 26.80139663 | 2.25E-07 | 0.00013973 |

Table S2 – Histopathological tumour features and NUDT15 expression

| Patient | Pathology | Tumour differentiation | T stage | N stage   | Lymphatic invasion | Vascular invasion | R Status | Surgical procedure     | Early recurrence within 12 months | Mean NUDT15 expression (% positive) |
|---------|-----------|------------------------|---------|-----------|--------------------|-------------------|----------|------------------------|-----------------------------------|-------------------------------------|
| 1       | PDAC      | Poor                   | T2      | N0        | L0                 | V0                | R0       | Whipple                | No                                | 5.7                                 |
| 2       | PDAC      | Moderate               | T2      | N1 (1/19) | L0                 | V1                | R1       | Whipple                | No                                | 8.4                                 |
| 3       | PDAC      | Moderate               | T1      | N0        | L0                 | V0                | R0       | TP                     | No                                | 7.3                                 |
| 4       | PDAC      | Poor                   | T2      | N2 (9/18) | L1                 | V1                | R0       | Whipple                | Yes                               | 19.1                                |
| 5       | PDAC      | Moderate               | T2      | N1 (3/49) | L1                 | V1                | R1       | Whipple + PV resection | Yes                               | 25.6                                |
| 6       | PDAC      | Moderate               | T3      | N2 (5/24) | L1                 | V1                | R1       | Whipple                | No                                | 16.1                                |
| 7       | PDAC      | Moderate               | T1      | N1 (2/32) | L1                 | V0                | R0       | TP                     | No                                | 8.2                                 |
| 8       | PDAC      | Moderate               | T1      | N2 (4/19) | L1                 | V1                | R1       | TP                     | No                                | 8.7                                 |
| 9       | PDAC      | Moderate               | T2      | N1 (3/38) | L1                 | V1                | R1       | Whipple                | No                                | 16.5                                |
| 10      | PDAC      | Moderate               | T2      | N2 (5/18) | L1                 | V0                | R0       | Whipple                | Yes                               | 27.1                                |
| 11      | PDAC      | Well                   | T2      | N2 (4/52) | L1                 | V1                | R1       | Whipple                | No                                | 6.1                                 |
| 12      | PDAC      | Moderate               | T2      | N0        | L0                 | V0                | R0       | Whipple                | No                                | 2.5                                 |
| 13      | PDAC      | Moderate               | T2      | N1 (2/44) | L1                 | V1                | R0       | Whipple                | No                                | 14.5                                |

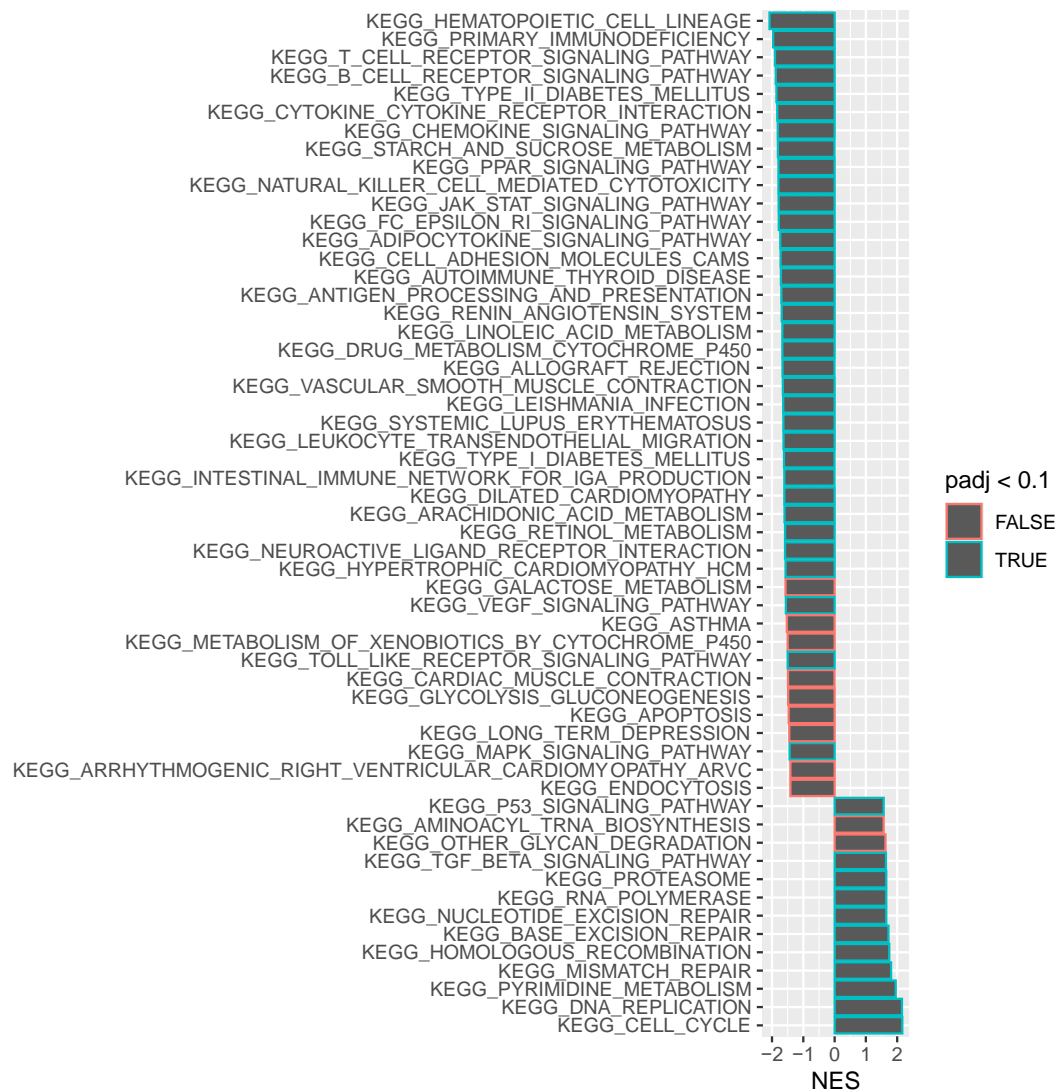

**Figure S1 – KEGG pathways enrichment analysis.** The normalised enrichment scores (NES) of each pathway are presented within a stacked bar chart that is ordered by the false discovery rate. A total of 34 different KEGG pathways were significantly down regulated and 11 pathways significantly up regulated.
